# Supplementary material
Source: PubMed Central journal article supplement (PMC8897997)
Supplement: web_material_kwab209.pdf [file web_material_kwab209.pdf]

**Early-Life Exposure to Green Space and Mid-Childhood Cognition  
in the Project Viva Cohort, Massachusetts**

Marcia P. Jimenez, Jessica Shoaff, Marianthi-Anna Kioumourtzoglou, Susan Korrick, Sheryl L. Rifas-Shiman, Marie-France Hivert, Emily Oken, and Peter James

Table of contents

- Web Table 1. Neurobehavioral functional domains measured by cognitive assessments.
- Web Figure 1. Cross-sectional and longitudinal associations examined in this study.
- Web Figure 2. Pearson correlation coefficients between exposure (greenness at different ages), potential mediators (Black carbon and physical activity at age 3) and outcomes (at age 7).
- Web Figure 3. Nonlinear Relationships Between Greenness and Cognitive Assessments at Early Childhood: (A) Vocabulary Comprehension, and (B) Visual-Motor Abilities.
- Web Table 2. Difference in average outcome scores with one interquartile range (IQR) increase in NDVI at birth, early childhood or mid-childhood with cognition assessments in early childhood and mid-childhood, fully adjusted.
- Web Table 3. Difference in average outcome scores with one interquartile range (IQR) increase in NDVI at birth, early childhood or mid-childhood with cognition assessments in early childhood and mid-childhood, adjusted by a minimal set of confounders.
- Web Figure 4. Nonlinear Relationship between Greenness at 90 m and Cognitive Assessments at Mid-childhood (A): Verbal IQ, (B) Non-verbal IQ, (C) Visual Memory, and (D) Visual-Motor Abilities; further adjusting for early childhood cognitive assessments.
- Web Figure 5. Sensitivity analysis without outliers. Nonlinear Relationship between Greenness at 90m and Cognitive Assessments at Mid-childhood: (A) Verbal IQ, (B) Non-verbal IQ, (C) Visual Memory, and (D) Visual-Motor Abilities.
- Web Figure 6. Nonlinear Relationship between Greenness at 270 m and Cognitive Assessments at Mid-childhood: (A) Verbal IQ, (B) Non-verbal IQ, (C) Visual Memory, and (D) Visual-Motor Abilities.
- Web Table 4. Demographic characteristics and green space exposure of final analysis sample (N=857) and full cohort (N=2128) of Project Viva participants.
- Web Table 5. Distribution [mean (standard deviation)] of cognitive measures by effect modifiers among 857 Project Viva participants.

Web Table 1. Neurobehavioral functional domains measured by cognitive assessments.

| Domain                    | Verbal IQ<br>(KBIT-2) | Nonverbal IQ<br>(KBIT-2) | Visual Motor<br>(WRAVMA) | Design Memory<br>(WRAML2) | Picture Memory<br>(WRAML2) |
|---------------------------|-----------------------|--------------------------|--------------------------|---------------------------|----------------------------|
| Crystallized intelligence | X                     | X                        |                          |                           |                            |
| Word knowledge            | X                     |                          |                          |                           |                            |
| Executive function        | X                     | X                        |                          | X                         | X                          |
| Fine motor skills         |                       |                          | X                        |                           |                            |
| Visuospatial perception   |                       | X                        | X                        | X                         |                            |
| Visual Memory             |                       |                          |                          | X                         | X                          |

Web Figure 1. Cross-sectional and longitudinal associations examined in this study.

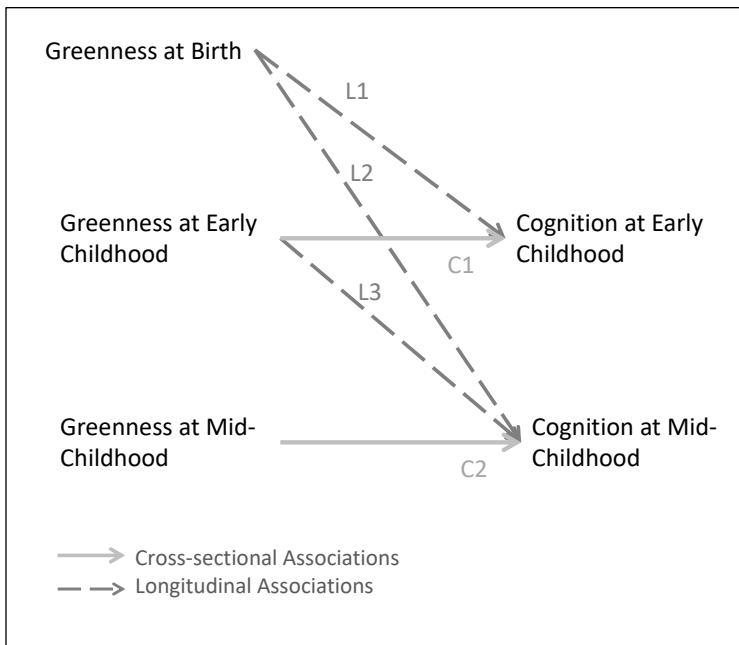

Web Figure 2. Pearson correlation coefficients between exposure (greenness at different ages), potential mediators (Black carbon and physical activity at age 3) and outcomes (at age 7).

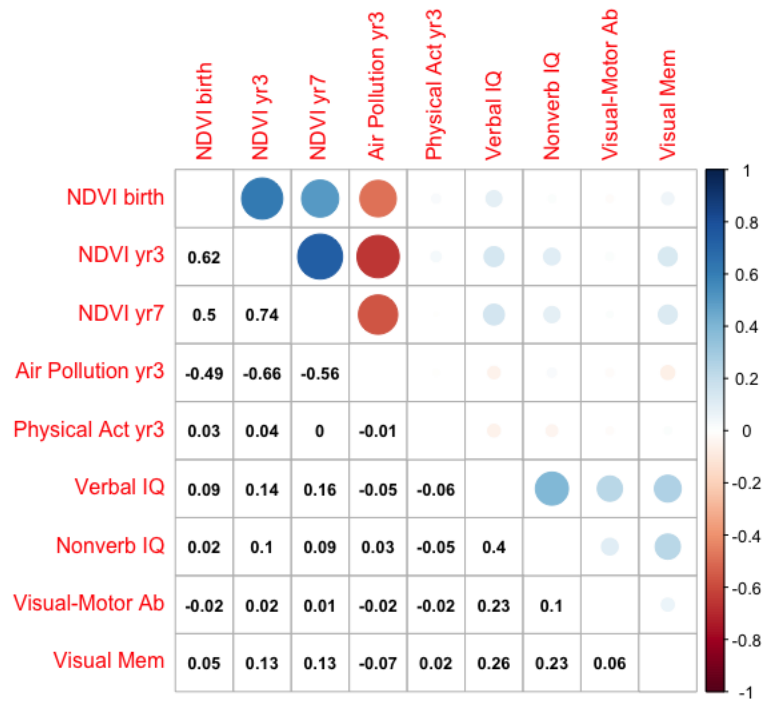

Web Figure 3. Nonlinear Relationships Between Greenness and Cognitive Assessments at Early Childhood: (A) Vocabulary Comprehension, and (B) Visual-Motor Abilities.

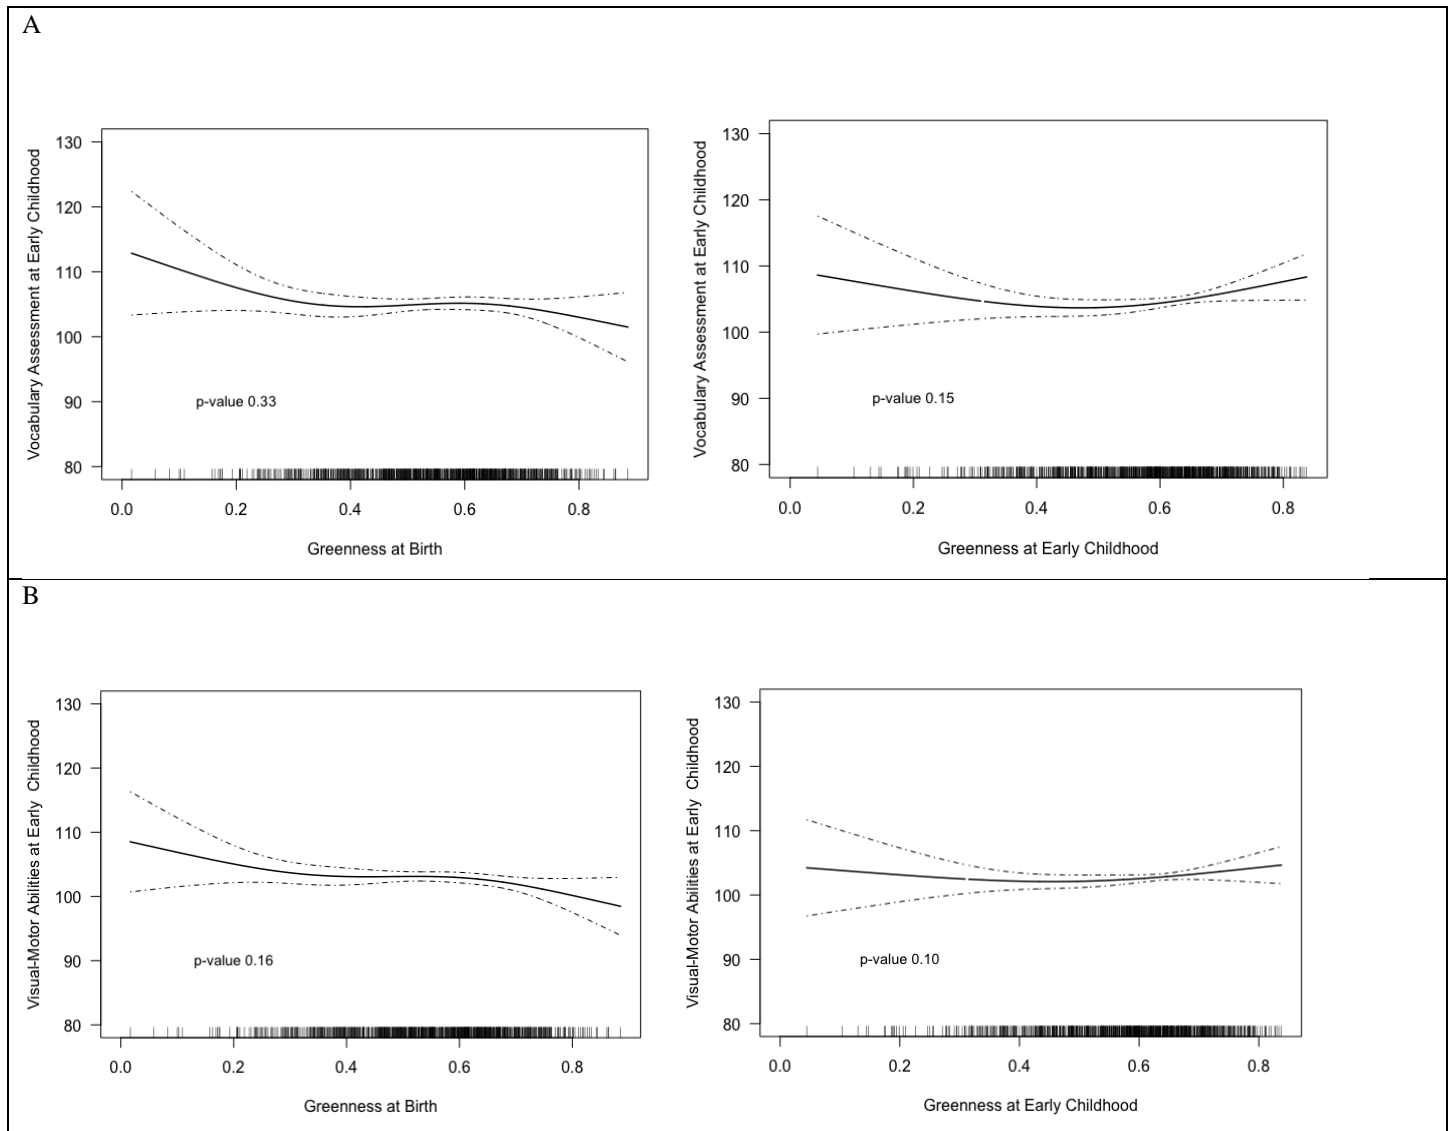

Note: Analyses were adjusted for sex, age at cognitive testing, maternal characteristics [IQ, education (high school degree, some college, or  $\geq$ college graduate), race (white, non-white)], father's education (high school degree, some college, or  $\geq$ college graduate), household [annual income at enrollment in early pregnancy (<40,000, 40,000-70,000, > \$70,000), neighborhood median annual income at birth, and greenness exposure in all preceding age-periods, but not in subsequent age-periods]. P-values correspond to spline terms for greenness exposure at each time point.

Web Table 2. Difference in average outcome scores with one interquartile range (IQR) increase in NDVI at birth, early childhood or mid-childhood with cognition assessments in early childhood and mid-childhood, fully adjusted.

| <b>Variable</b>             | <b>Birth<br/>Estimate (95% CI)</b> | <b>Early childhood<br/>Estimate (95% CI)</b> | <b>Mid-childhood<br/>Estimate (95% CI)</b> |
|-----------------------------|------------------------------------|----------------------------------------------|--------------------------------------------|
| Early Childhood Assessments |                                    |                                              |                                            |
| Vocabulary                  | -1.37 (-2.95, 0.21)                | 0.71 (-1.02, 2.44)                           |                                            |
| Motor Abilities             | -1.29 (-2.62, 0.04)                | 0.48 (-0.96, 1.92)                           |                                            |
| Mid-childhood Assessments   |                                    |                                              |                                            |
| Verbal IQ                   | -0.16 (-1.64, 1.32)                | 0.37 (-1.26, 2)                              | 0.64 (-1.13, 2.41)                         |
| Non-verbal IQ               | -0.77 (-2.69, 1.15)                | 1.66 (-0.44, 3.77)                           | 0.25 (-2.04, 2.54)                         |
| Motor Abilities             | -0.93 (-2.94, 1.08)                | 0.03 (-2.18, 2.25)                           | -0.56 (-2.97, 1.84)                        |
| Visual Memory               | 0.04 (-0.48, 0.57)                 | 0.76 (0.19, 1.34)                            | 0.35 (-0.27, 0.97)                         |

Note: Analyses were adjusted for sex, age at cognitive testing, maternal characteristics [IQ, education (high school degree, some college, or ≥college graduate), race (white, non-white)], father’s education (high school degree, some college, or ≥college graduate), household [annual income at enrollment in early pregnancy (<40,000, 40,000-70,000, > \$70,000), neighborhood median annual income at birth, and greenness exposure in all preceding age-periods, but not in subsequent age-periods.

Web Table 3. Difference in average outcome scores with one interquartile range (IQR) increase in NDVI at birth, early childhood or mid-childhood with cognition assessments in early childhood and mid-childhood, adjusted by a minimal set of confounders.

| Variable                    | Birth<br>Estimate (95% CI) | Early childhood<br>Estimate (95% CI) | Mid-childhood<br>Estimate (95% CI) |
|-----------------------------|----------------------------|--------------------------------------|------------------------------------|
| Early Childhood Assessments |                            |                                      |                                    |
| Vocabulary                  | -0.97 (-2.47, 0.53)        | 1.14 (-0.47, 2.76)                   |                                    |
| Motor Abilities             | -1.42 (-2.69, -0.15)       | 0.77 (-0.58, 2.12)                   |                                    |
| Mid-childhood Assessments   |                            |                                      |                                    |
| Verbal IQ                   | 0.41 (-0.99, 1.81)         | 0.69 (-0.81, 2.2)                    | 0.84 (-0.8, 2.48)                  |
| Non-verbal IQ               | -1.14 (-2.94, 0.66)        | 1.52 (-0.42, 3.46)                   | 0.31 (-1.81, 2.43)                 |
| Motor Abilities             | -0.26 (-2.15, 1.62)        | -0.44 (-2.46, 1.59)                  | -0.84 (-3.05, 1.37)                |
| Visual Memory               | 0.08 (-0.41, 0.57)         | <b>0.92 (0.4, 1.45)</b>              | 0.16 (-0.41, 0.73)                 |

Note: Analyses were adjusted for sex, age at cognitive testing, maternal characteristics [IQ, education (high school degree, some college, or ≥college graduate), race (white, non-white)], neighborhood median annual household income at birth, and greenness exposure in all preceding age-periods, but not in subsequent age-periods.

Web Figure 4. Nonlinear Relationship between Greenness at 90 m and Cognitive Assessments at Mid-childhood (A): Verbal IQ, (B) Non-verbal IQ, (C) Visual Memory, and (D) Visual-Motor Abilities; further adjusting for early childhood cognitive assessments.

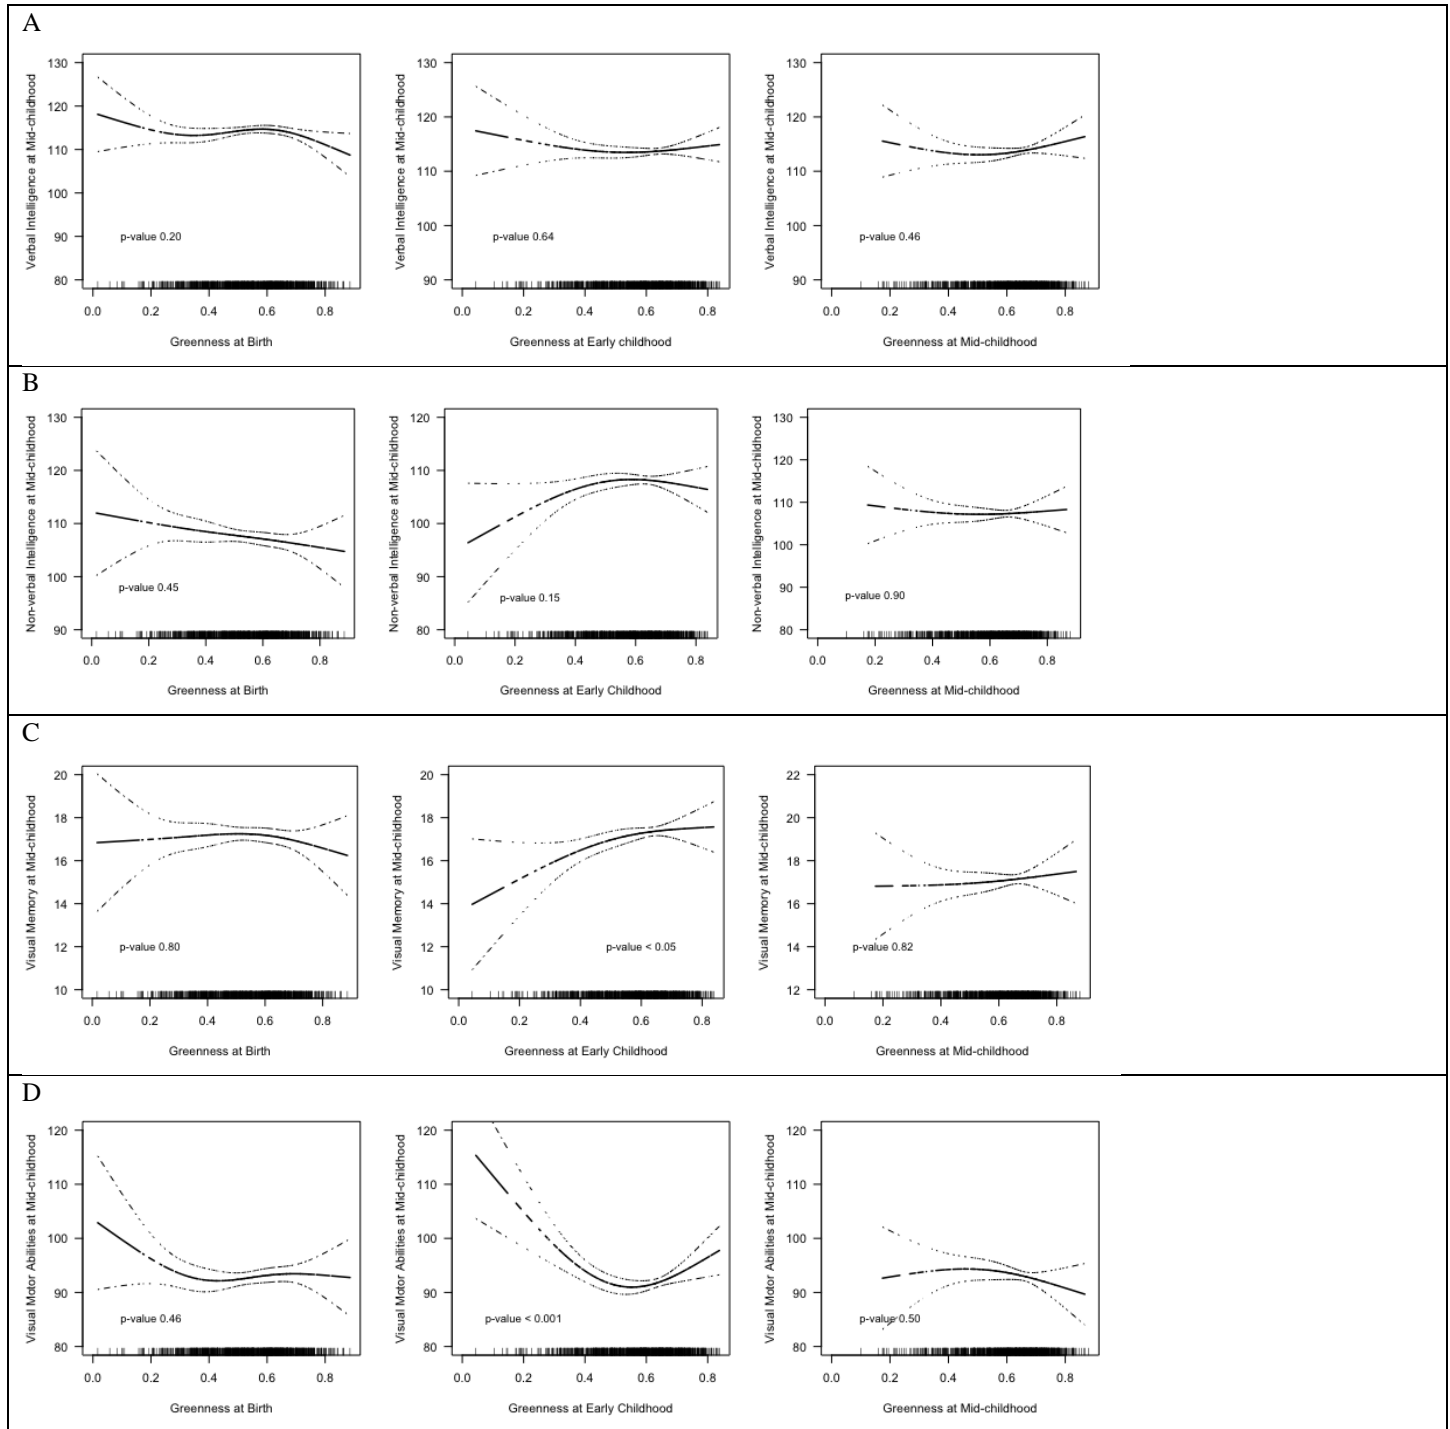

Note: Analyses were adjusted for sex, age at cognitive testing, maternal characteristics [IQ, education (high school degree, some college, or  $\geq$ college graduate), race (white, non-white)], father's education (high school degree, some college, or  $\geq$ college graduate), household [annual income at enrollment in early pregnancy (<40,000, 40,000-70,000, > \$70,000), neighborhood median annual income at birth, and early childhood cognitive assessment]. Later exposure timepoints additionally adjusted for early exposure timepoints. For example, NDVI in mid-childhood adjusted for NDVI at birth, and early childhood. P-values correspond to spline terms for greenness exposure at each time point.

Web Figure 5. Sensitivity analysis without outliers. Nonlinear Relationship between Greenness at 90m and Cognitive Assessments at Mid-childhood: (A) Verbal IQ, (B) Non-verbal IQ, (C) Visual Memory, and (D) Visual-Motor Abilities.

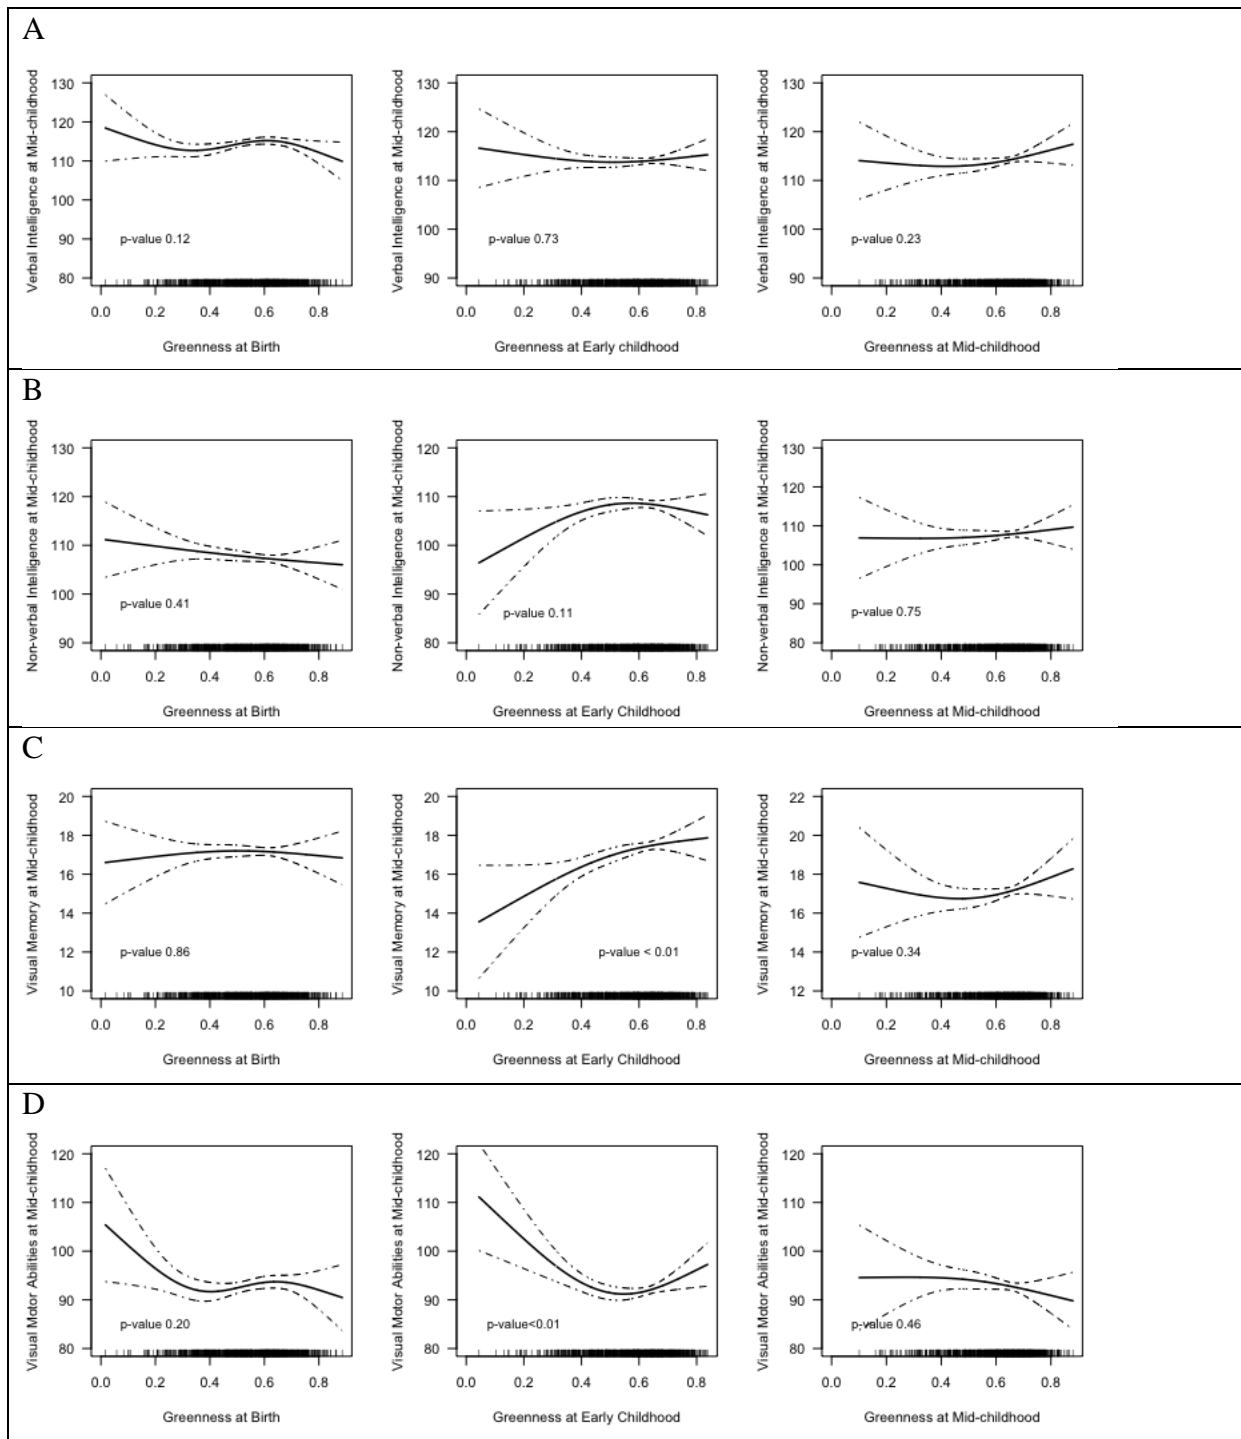

Note: Analyses were adjusted for sex, age at cognitive testing, maternal characteristics [IQ, education (high school degree, some college, or  $\geq$ college graduate), race (white, non-white)], father's education (high school degree, some college, or  $\geq$ college graduate), household [annual income at enrollment in early pregnancy (<40,000, 40,000-70,000, > \$70,000), and neighborhood median annual income at birth.

Later exposure timepoints additionally adjusted for early exposure timepoints. For example, NDVI in mid-childhood adjusted for NDVI at birth, and early childhood.

P-values correspond to spline terms for greenness exposure at each time point.



Web Figure 6. Nonlinear Relationship between Greenness at 270 m and Cognitive Assessments at Mid-childhood: (A) Verbal IQ, (B) Non-verbal IQ, (C) Visual Memory, and (D) Visual-Motor Abilities.

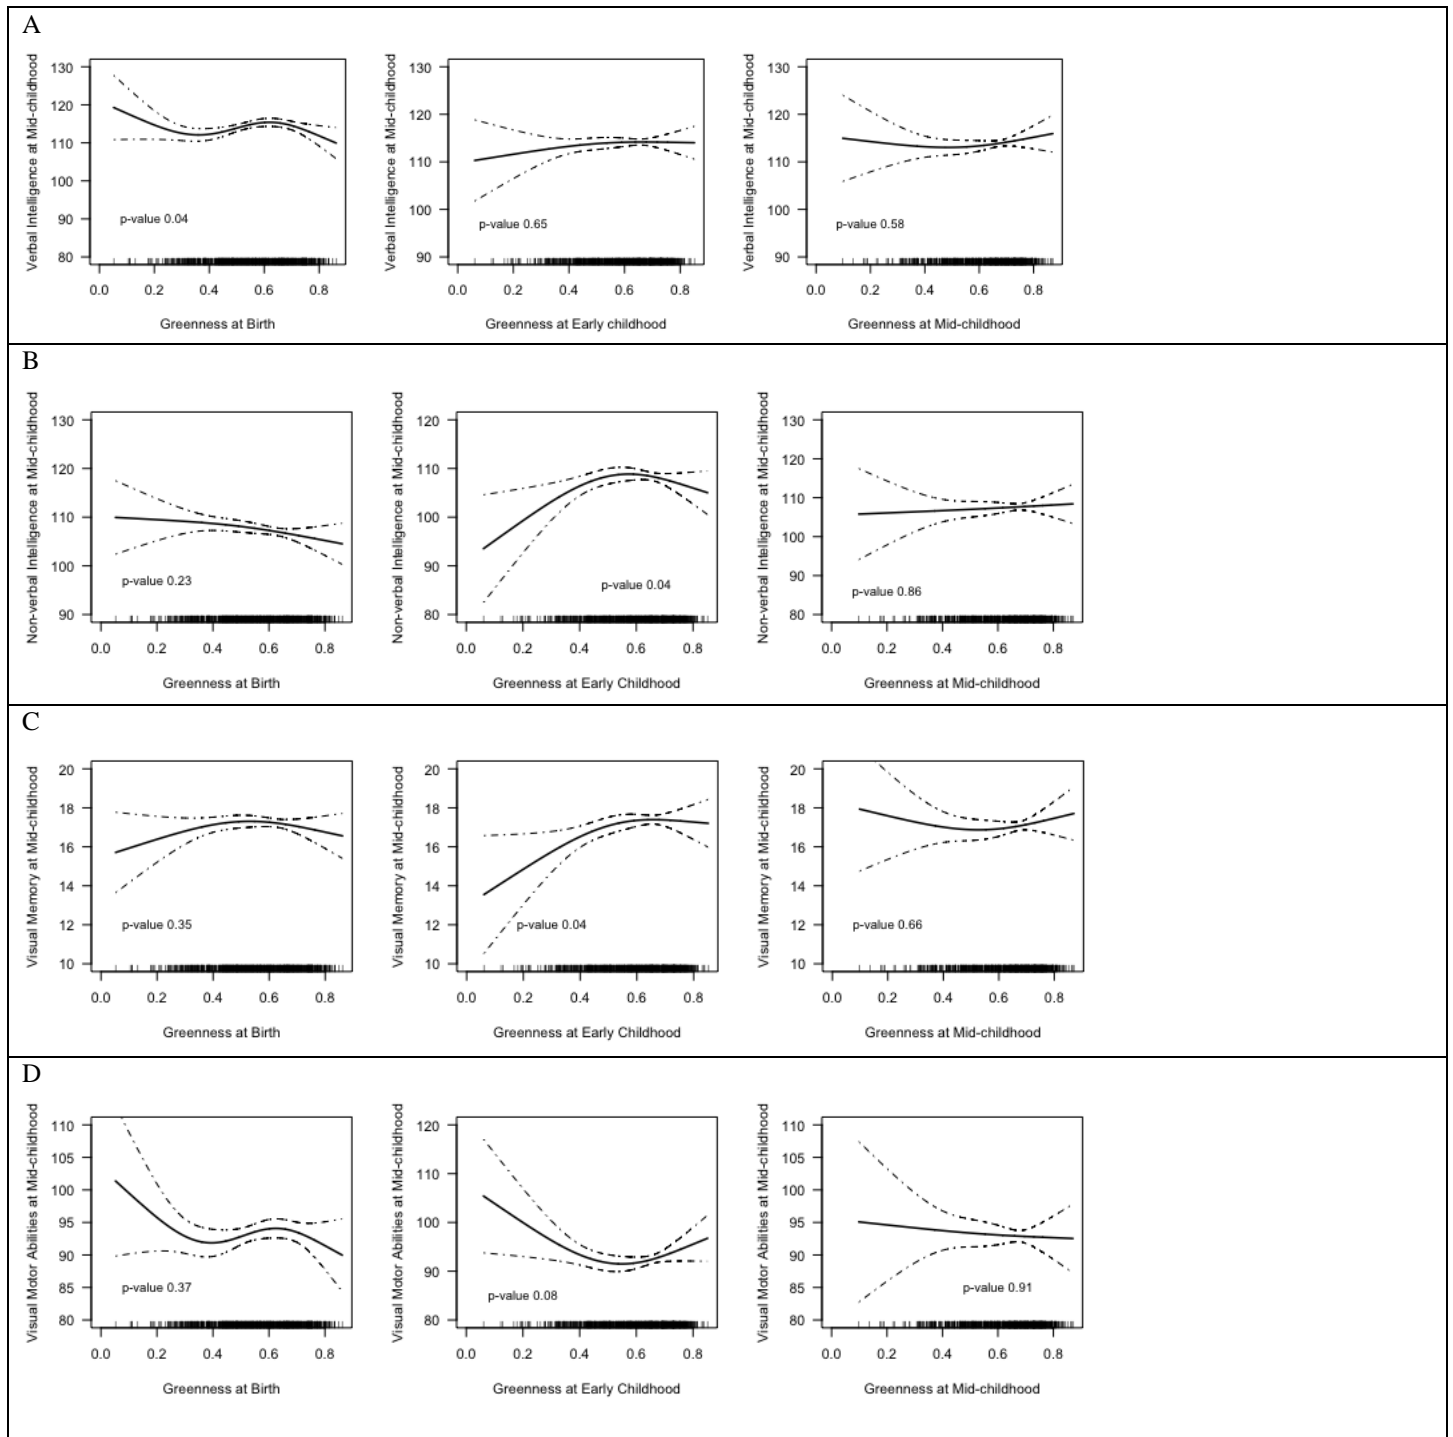

Note: Analyses were adjusted for sex, age at cognitive testing, maternal characteristics [IQ, education (high school degree, some college, or  $\geq$ college graduate), race (white, non-white)], father's education (high school degree, some college, or  $\geq$ college graduate), household [annual income at enrollment in early pregnancy (<40,000, 40,000-70,000, > \$70,000), and neighborhood median annual income at birth.

Later exposure timepoints additionally adjusted for early exposure timepoints. For example, NDVI in mid-childhood adjusted for NDVI at birth, and early childhood.

P-values correspond to spline terms for greenness exposure at each time point.

Web Table 4. Demographic characteristics and green space exposure of final analysis sample (N=857) and full cohort (N=2128) of Project Viva participants.

| <b>Variable</b>                                                             | <b>Final analysis sample<br/>(N=857)</b> | <b>Full cohort (N=2128)</b> |
|-----------------------------------------------------------------------------|------------------------------------------|-----------------------------|
| Child's age at mid-childhood, years (mean $\pm$ SD)                         | 7.85 $\pm$ 0.77                          | 7.96 $\pm$ 0.85             |
| Child's sex % female                                                        | 51.34                                    | 48.5                        |
| Child's race % White                                                        | 71.3                                     | 63.06                       |
| Mother's education % $\geq$ college graduate                                | 74.68                                    | 64.64                       |
| Father's education % $\geq$ college graduate                                | 68.73                                    | 64.55                       |
| Household income at enrollment in early pregnancy %<br>>US\$70,000 per year | 66.63                                    | 61.15                       |
| Census tract median household income at birth (US\$)<br>(mean $\pm$ SD)     | 59,355 $\pm$ 21,004                      | 57,010 $\pm$ 21,368         |
| NDVI at birth (mean $\pm$ SD)                                               | 0.54 $\pm$ 0.15                          | 0.52 $\pm$ 0.15             |
| NDVI at early childhood (mean $\pm$ SD)                                     | 0.57 $\pm$ 0.14                          | 0.56 $\pm$ 0.14             |
| NDVI at mid-childhood (mean $\pm$ SD)                                       | 0.60 $\pm$ 0.13                          | 0.59 $\pm$ 0.14             |
| Verbal IQ at mid-childhood (mean $\pm$ SD)                                  | 113.87 $\pm$ 13.92                       | 111.83 $\pm$ 15.11          |
| Non-verbal IQ at mid-childhood (mean $\pm$ SD)                              | 107.46 $\pm$ 16.55                       | 106.31 $\pm$ 16.96          |
| Motor Abilities at mid-childhood (mean $\pm$ SD)                            | 93.07 $\pm$ 16.92                        | 91.99 $\pm$ 16.73           |
| Visual Memory at mid-childhood (mean $\pm$ SD)                              | 17.1 $\pm$ 4.4                           | 16.9 $\pm$ 4.4              |

Web Table 5. Distribution [mean (standard deviation)] of cognitive measures by effect modifiers among 857 Project Viva participants.

| <b>Effect Modifier</b>                                                       | <b>Verbal IQ</b> | <b>Non-verbal IQ</b> | <b>Motor Abilities</b> | <b>Visual Memory</b> |
|------------------------------------------------------------------------------|------------------|----------------------|------------------------|----------------------|
| Sex                                                                          |                  |                      |                        |                      |
| Males (N=417)                                                                | 112.53 (14.75)   | 105.9 (16.88)        | 91.15 (17.49)          | 16.9 (4.62)          |
| Females (N=440)                                                              | 115.14 (12.97)   | 108.94 (16.11)       | 94.89 (16.17)          | 17.29 (4.18)         |
| Parental education                                                           |                  |                      |                        |                      |
| Low parental education (N=333)                                               | 107.93 (14.34)   | 103.5 (15.99)        | 90.76 (17.08)          | 16.57 (4.35)         |
| High parental education (N=524)                                              | 117.64 (12.25)   | 109.98 (16.42)       | 94.54 (16.67)          | 17.44 (4.4)          |
| Neighborhood socio-economic status based on median household income at birth |                  |                      |                        |                      |
| Low NSES (N=285)                                                             | 110.08 (14.91)   | 105.66 (15.68)       | 92.52 (17.25)          | 16.6 (4.13)          |
| Medium NSES (N=284)                                                          | 114.11 (12.86)   | 106.79 (16.6)        | 92.55 (16.37)          | 17.24 (4.56)         |
| High NSES (N=285)                                                            | 117.37 (13.03)   | 109.98 (17.1)        | 94.23 (17.11)          | 17.44 (4.5)          |
| Population density                                                           |                  |                      |                        |                      |
| Low population density (N=284)                                               | 114.48 (11.99)   | 106.94 (16.2)        | 92.65 (16.69)          | 17.25 (4.31)         |
| Medium population density (N=284)                                            | 115.48 (13.54)   | 108.16 (17.26)       | 93.46 (17.48)          | 17.24 (4.64)         |
| High population density (N=284)                                              | 111.58 (15.83)   | 107.34 (16.28)       | 93.11 (16.61)          | 16.78 (4.28)         |
